# Supplementary material for: New organophilic kaolin clays based on single-point grafted 3-aminopropyl dimethylethoxysilane
Source: Royal Society of Chemistry journal article supplement (doi:10.1039/c5cp04395f), 2015-01-01
Supplement: c5cp04395f1.pdf [file c5cp04395f1.pdf]

## Supporting information for

# New organophilic kaolin clays based on single- point grafted 3-aminopropyl dimetylethoxysilane

Anamaria Zaharia<sup>[a]</sup>, Francois-Xavier Perrin<sup>\*[b]</sup>, Mircea Teodorescu<sup>[c]</sup>, Anita-Laura Radu<sup>[a]</sup>, Tanta –Verona Iordache<sup>[a]</sup>, Ana-Mihaela Florea<sup>[a]</sup>, Dan Donescu<sup>[a]</sup>, Andrei Sarbu<sup>\*[a]</sup>

## Introduction

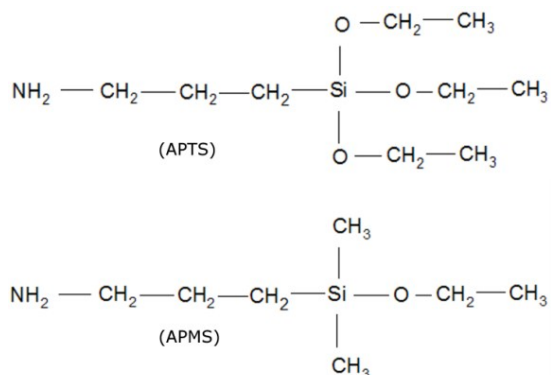

**Fig. S1.** The chemical structure of the 3-aminopropyl triethoxysilane (APTS) – the trifunctional silane and 3-aminopropyl dimethylethoxysilane (APMS) – the monofunctional silane

- 
- [a] Dr.eng. A. Zaharia, Dr.eng. A.-L. Radu, Dr.eng T.–V. Iordache, Ms.D.eng A.-M. Florea, Prof. Dr.eng. D. Donescu, Dr.eng A. Sarbu Advanced Polymer Materials and Polymer Recycling  
The National R&D Institute for Chemistry and Petrochemistry ICECHIM  
Splaiul Independentei 202, 060021, Bucharest, Romania  
\*E-mail: andr.sarbu@gmail.com
- [b] Prof. Dr. F.X. Perrin  
Laboratoire Matériaux Polymères Interfaces et Environnement Marin  
Université du Sud Toulon-Var  
BP 132, 83957 La Garde Cedex, France  
\*E-mail: perrin@univ-tln.fr
- [c] Prof. Dr.eng. M. Teodorescu  
Department of Bioresources and Polymer Science  
Politehnica University of Bucharest  
Calea Victoriei 149, 010072 Bucharest, Romania

## Results and Discussion

### Raw kaolin

#### TGA/DTG

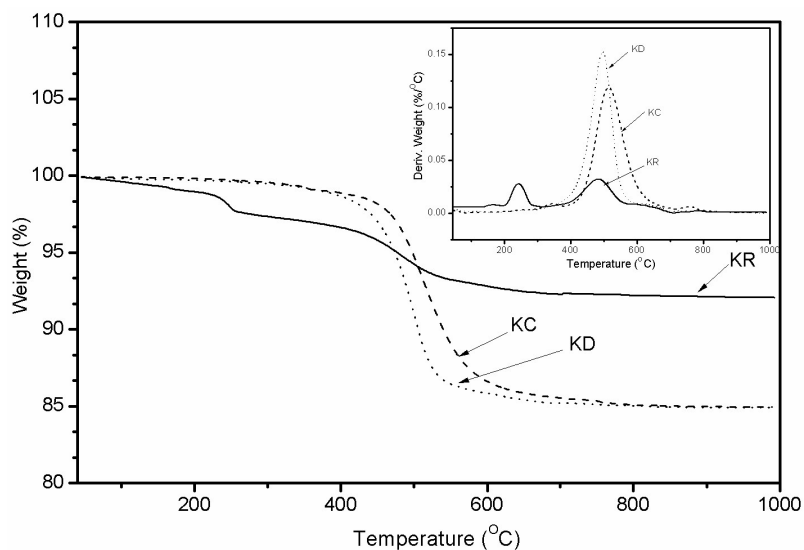

**Fig S2** TGA curves/DTG inset of the three kaolin samples

According to KR thermogram, the curve displayed two important degradation stages, and traces of bounded water, from the heterogeneous oxide phases, of about 0.9 wt%. The first mass loss (i.e. 1.6 wt%) with the maximum degradation temperature at 244 °C was attributed to the conversion of gibbsite into boehmite,<sup>32</sup> while the following, degradation step, with a maximum around 490 °C (5.4 wt% loss) corresponded to  $\gamma$ -AlOOH conversion into  $\text{Al}_2\text{O}_3$ .

#### FTIR

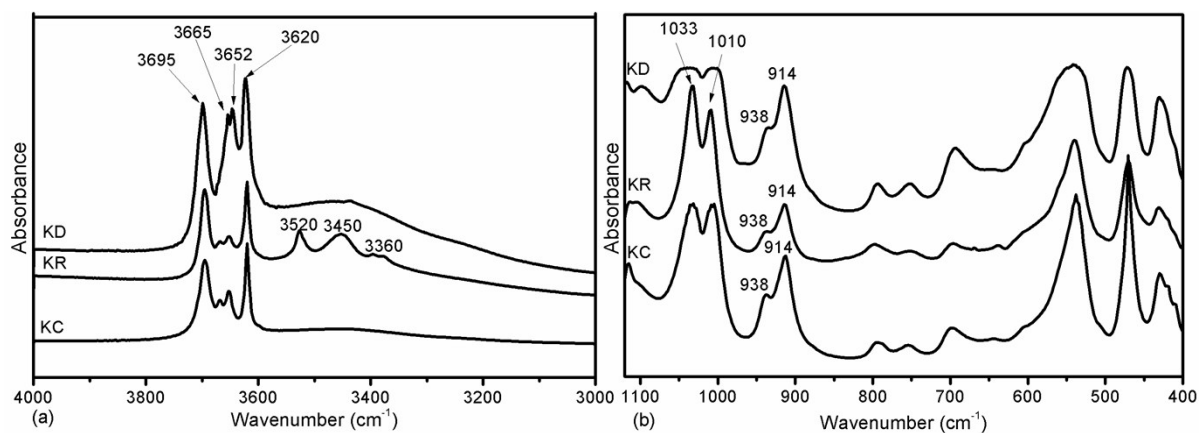

**Fig S3.** Infrared spectra of the three kaolin samples; (4000–3000 $\text{cm}^{-1}$ ) **(a)** and (1150 – 450  $\text{cm}^{-1}$ ) **(b)** wavenumber ranges

The FTIR spectra of KR, KC and KD were similar, and agreed well with those reported in the literature.<sup>24, 25, 27</sup> The hydroxyl stretching region contained four characteristic bands for all three kaolin types (**Fig S3a**). Hence, the bands recorded at 3695 cm<sup>-1</sup>, 3665 cm<sup>-1</sup> and 3652 cm<sup>-1</sup> were assigned to the  $\nu_{\text{O-H}}$  vibration of inner hydroxyl surface (interlamellar) while the band at 3620 cm<sup>-1</sup> was due to the  $\nu_{\text{O-H}}$  vibration of inner hydroxyl groups (intralamellar).<sup>33</sup> The bands in the 1120-1000 cm<sup>-1</sup> region were associated with three different Si-O-Si in plane stretching vibrations,<sup>34</sup> and the characteristic bands of the interlamellar and intralamellar aluminol groups (**Fig S3b**), can also be observed at 938 cm<sup>-1</sup> and 914 cm<sup>-1</sup>, respectively.<sup>33,35</sup>

#### X-ray

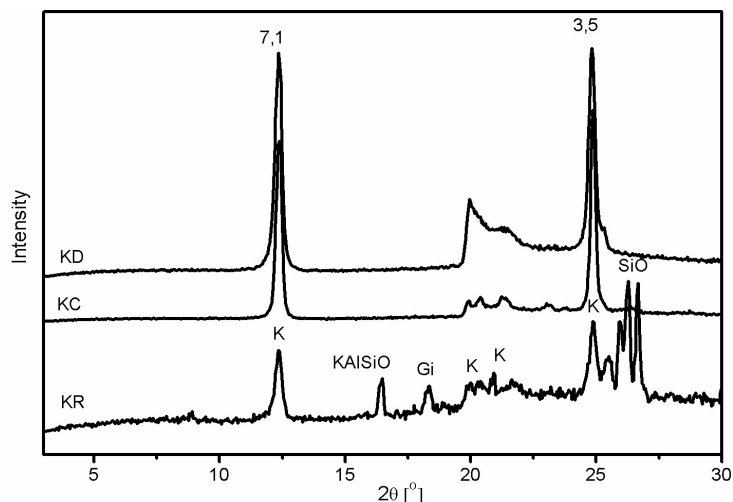

**Fig S4.** XRD patterns of the three kaolin samples

All samples displayed characteristic basal diffraction peaks at 7.1 Å and 3.5 Å, as literature reports.<sup>36, 37</sup>

#### DMSO - kaolinite intercalation

#### TGA / DTG

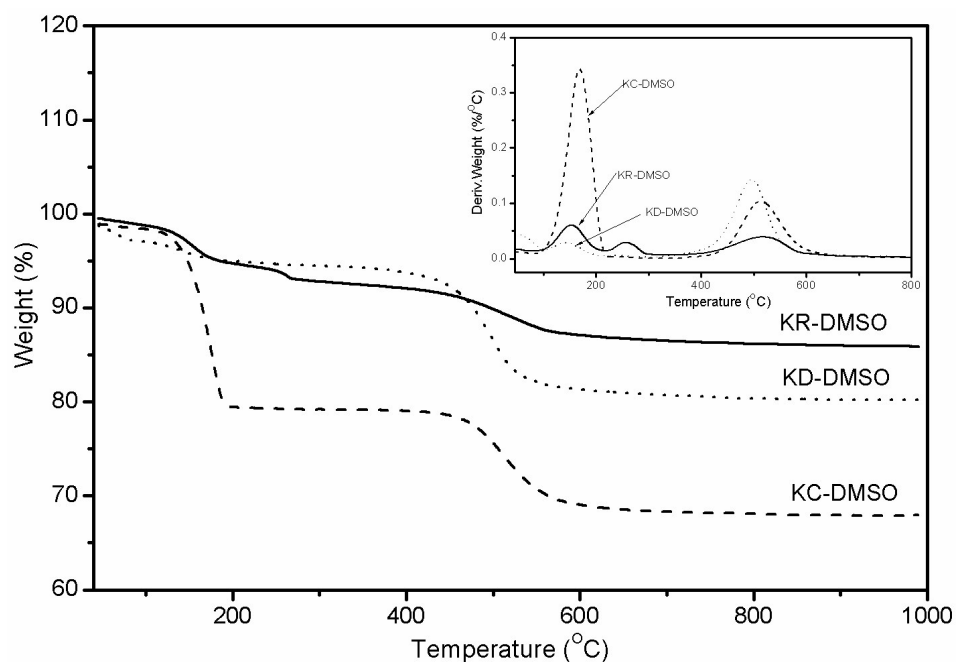

**Fig S5.** The TGA curves /DTG inset of the three DMSO-intercalated kaolin samples

#### FTIR

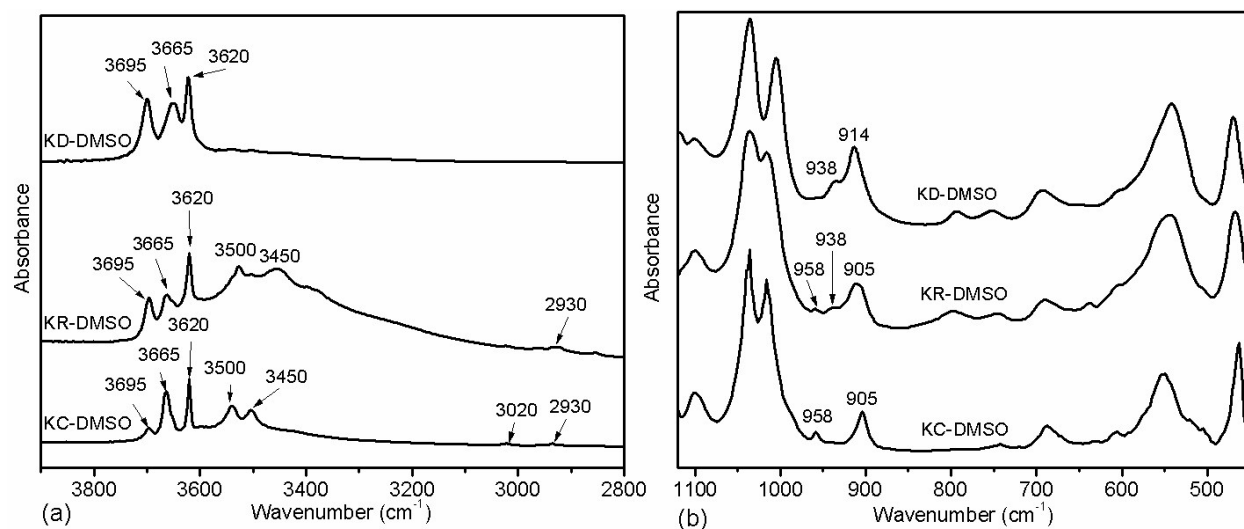

**Fig S6.** Infrared spectra of the three DMSO-intercalated kaolin samples; (4000–3000cm<sup>-1</sup>) **(a)** and (1150 – 450 cm<sup>-1</sup>) **(b)** wavenumber ranges

New bands, i.e. 3020 cm<sup>-1</sup> and 2930 cm<sup>-1</sup>, corresponding to  $\nu_{\text{CH}_3}$  reflected the presence of DMSO molecules in KC-DMSO and KR-DMSO samples (**Fig S6a**).<sup>16, 21, 22-25,28</sup>

## X-Ray

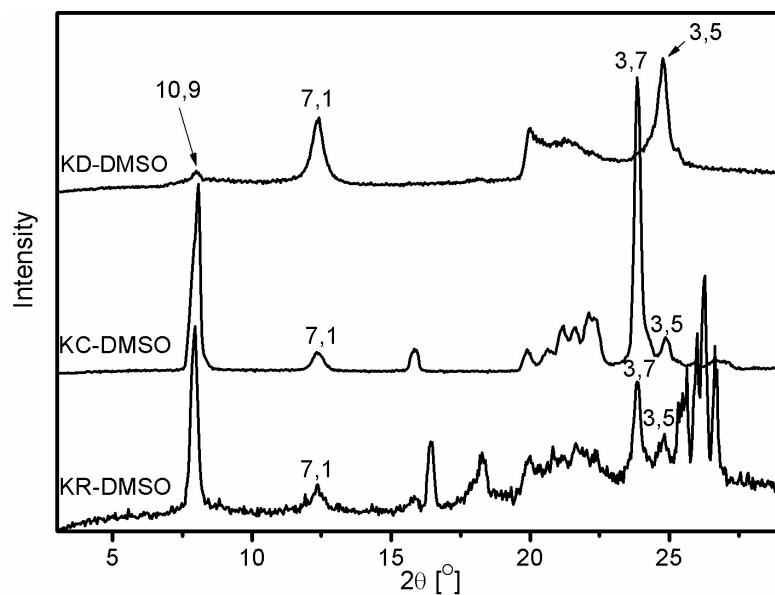

**Fig S7.** XRD patterns of the three DMSO-intercalated kaolin samples

## Organophilization process

### FTIR

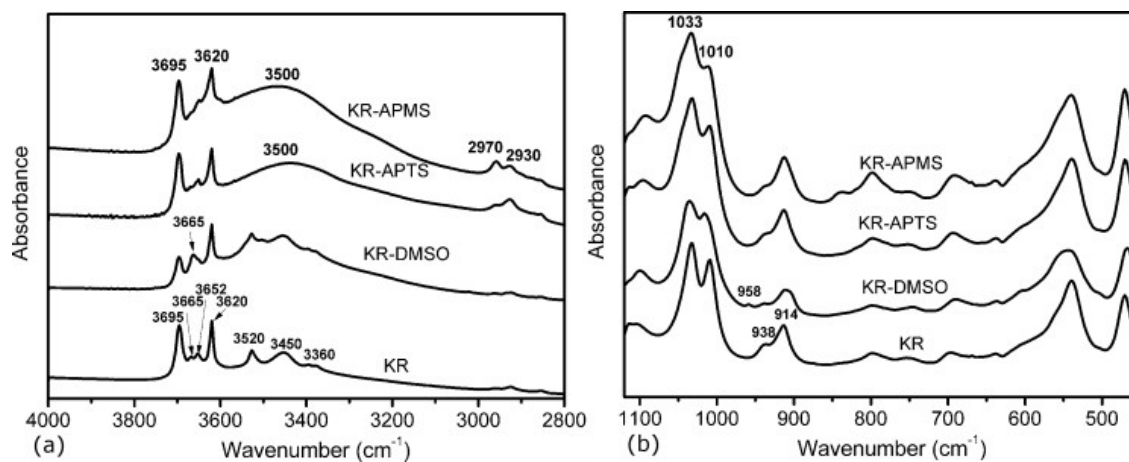

**Figure S8.** The infrared spectra of KR, KR-DMSO, KR-APTS and KR-APMS in the 4000-2800  $\text{cm}^{-1}$  **(a)** and 1100-450  $\text{cm}^{-1}$  **(b)** specific wavenumber range
